Title: Assessment of population differentiation and linkage disequilibrium in  
*Solanum pimpinellifolium* using genome-wide high-density SNP markers

Authors: Ya-Ping Lin, Chu-Yin Liu, Kai-Yi Chen

Institutional affiliations:

Department of Agronomy, National Taiwan University, Taipei, Taiwan, 10617

Data available:

Short reads of DNA sequences: NCBI SRA BioProject Number PRJNA358110

Supplemental figures: <https://doi.org/10.6084/m9.figshare.7010495.v1>

Supplemental tables: <https://doi.org/10.6084/m9.figshare.7010492.v1>

Short running title: RADseq in *S. pimpinellifolium*

Keywords: *Solanum pimpinellifolium*, population differentiation, linkage disequilibrium pattern, restriction site associated DNA sequencing.

Corresponding author: Kai-Yi Chen

Office mailing address: No.1, Sec. 4, Roosevelt Rd., Da'an Dist., Department of Agronomy, National Taiwan University, Taipei City, Taiwan, 10617

Phone number: +886 2 3366 4766

Email address: kaiychen@ntu.edu.tw

1

## ABSTRACT

2       To mine new favorable alleles for tomato breeding, we investigated the  
3 feasibility of utilizing *Solanum pimpinellifolium* as a diverse panel of  
4 genome-wide association study through the restriction site-associated DNA  
5 sequencing technique. Previous attempts to conduct genome-wide association  
6 study using *S. pimpinellifolium* were impeded by an inability to correct for  
7 population stratification and by lack of high-density markers to address the  
8 issue of rapid linkage disequilibrium decay. In the current study, a set of  
9 24,330 SNPs was identified using 99 *S. pimpinellifolium* accessions from the  
10 Tomato Genetic Resource Center. Approximately 84% *Pst*I site-associated  
11 DNA sequencing regions were located in the euchromatic regions, resulting in  
12 the tagging of most SNPs on or near genes. Our genotypic data suggested  
13 that the optimum number of *S. pimpinellifolium* ancestral subpopulations was  
14 three, and accessions were classified into seven groups. In contrast to the  
15 SolCAP SNP genotypic data of previous studies, our SNP genotypic data  
16 consistently confirmed the population differentiation, achieving a relatively  
17 uniform correction of population stratification. Moreover, as expected, rapid  
18 linkage disequilibrium decay was observed in *S. pimpinellifolium*, especially in  
19 euchromatic regions. Approximately two-thirds of the flanking SNP markers  
20 did not display linkage disequilibrium. Our result suggests that higher density  
21 of molecular markers and more accessions are required to conduct the  
22 genome-wide association study utilizing the *Solanum pimpinellifolium*  
23 collection.

24

## INTRODUCTION

25       The wild tomato species *Solanum pimpinellifolium* is a native perennial  
26 shrub in Ecuador and Peru and is believed to have originated in northern Peru  
27 and then diversified into several subpopulations after it migrated to Ecuador  
28 and southern Peru (Rick *et al.* 1977; Zuriaga *et al.* 2009; Blanca *et al.* 2012,  
29 2015). The accessions in northern Peru display higher genetic variation and a  
30 higher outcrossing rate than those in southern Peru (Rick *et al.* 1977; Caicedo  
31 and Schaal 2004). Recent studies suggested that *S. pimpinellifolium* can be  
32 divided into at least three subpopulations: one in Peru, one in northern  
33 Ecuador and one in the mountains of Ecuador (Zuriaga *et al.* 2009; Blanca *et*  
34 *al.* 2012, 2015). In addition, the major climatic parameters, such as  
35 temperature and precipitation, show unidirectional gradient changes from  
36 southern Peru towards Ecuador (Zuriaga *et al.* 2009). Because geographic  
37 distributions of distinct *S. pimpinellifolium* subpopulations also aligned from  
38 south to north, it was proposed that the genetic distances between  
39 subpopulations were correlated with climatic differences (Zuriaga *et al.* 2009;  
40 Blanca *et al.* 2012, 2015).

41       *S. pimpinellifolium* is an attractive resource for tomato breeding because  
42 it can freely cross with cultivated tomatoes and introduces novel alleles into the  
43 limited gene pool of cultivated tomatoes (Tanksley and Mccouch 1997;  
44 Spooner *et al.* 2005; Moyle 2008). *S. pimpinellifolium* has been used as a  
45 genetic resource for disease resistance and fruit quality traits in tomato  
46 breeding (Grandillo *et al.* 2011; Viquez-zamora *et al.* 2014; Capel *et al.* 2015).  
47 A core collection of *S. pimpinellifolium* was developed by AVRDC for the

48 purpose of preservation and utilization (Rao *et al.* 2012). This core collection  
49 has been used to mine novel alleles of salt tolerance via genome-wide  
50 association study (GWAS) (Rao *et al.* 2015).

51 GWAS utilizes linkage disequilibrium (LD), the non-random association  
52 between marker alleles and alleles conferring targeted phenotypes in a given  
53 population of germplasm, to map quantitative trait loci (QTLs) (Soto-Cerda and  
54 Cloutier 2012). The average ranges of LD decay in different collections of  
55 cultivated tomatoes varied from 6 to 13 cM (Sim *et al.* 2012a; Pascual *et al.*  
56 2015; Bauchet *et al.* 2017). It is expected that the range of LD decay is smaller  
57 in *S. pimpinellifolium* populations because *S. pimpinellifolium* presents larger  
58 genetic variation than cultivated tomatoes (Blanca *et al.* 2012, 2015; Ranc *et al.*  
59 2012; Bauchet *et al.* 2017). Indeed, the SolCAP array with 7,720 SNPs did not  
60 achieve full LD coverage across all chromosomal regions for GWAS using  
61 *S. pimpinellifolium* accessions (Sim *et al.* 2012a, 2012b; Bauchet *et al.* 2017).  
62 The restriction site-associated DNA sequencing (RADseq) technique might  
63 provide an inexpensive solution to address this challenge (Davey and Blaxter  
64 2010). The RADseq technique limits sequencing resources at the vicinity of  
65 restriction enzyme cutting sites and therefore provides flexibility of  
66 experimental design in terms of the trade-off between cost-effectiveness and  
67 marker densities (Chen *et al.* 2014; Bhakta *et al.* 2015).

68 The objective of the current study was to develop genome-wide  
69 high-density SNP markers for a subset of *S. pimpinellifolium* collections from  
70 the Tomato Genetic Resource Center (TGRC) through the RADseq approach.  
71 The population differentiation and the range of LD decay were then assessed.

72

## MATERIALS AND METHODS

### 73 **Plant materials**

74 All plant materials and their information were obtained from TGRC (Table  
75 S1; <http://tgrc.ucdavis.edu/>). In this study, 12 accessions from Ecuador and 87  
76 accessions from Peru were utilized. According to their mating types, 43  
77 accessions were facultative self-compatible (FSC) and 56 accessions were  
78 autogamous self-compatible (ASC). Seeds were propagated by self-pollination  
79 for two generations using the method of single-seed descent in a greenhouse.  
80 Young leaves collected from plants of these single-seed descendent seeds  
81 were used for DNA extraction.

### 82 **RAD sequencing**

83 Total genomic DNA was extracted from young leaves using a modified  
84 CTAB method (Fulton *et al.* 1995) and purified with a DNeasy Blood & Tissue  
85 Kit (QIAGEN, Venlo, Netherland) following the manufacturer's instructions.  
86 *Pst*I-digested DNA libraries were prepared following the protocol of Etter *et al.*  
87 (Etter *et al.* 2011). Four RADseq libraries were constructed, and each was  
88 sequenced in one lane of an Illumina HiSeq2000 flow cell (100 bp single-end  
89 reads) (Illumina Inc., San Diego, CA, USA).

### 90 **SNP calling**

91 Reads were analyzed with Stacks version 1.37 (Catchen *et al.* 2013) and  
92 with CLC Genomics Workbench software version 6.5.1 (QIAGEN, Venlo,  
93 Netherlands) ("CLC Genomics Workbench 6.5.1"). First, the *process\_radtags*  
94 command in Stacks filtered out low-quality reads with Q scores less than 20.

95 The remaining reads were mapped to the tomato reference genome SL2.50  
96 (Fernandez-Pozo *et al.* 2015) using the “Map Reads to Reference” tool in the  
97 CLC Genomics Workbench software. Considering that genetic variation  
98 between the tomato reference genome *S. lycopersicum* and  
99 *S. pimpinellifolium* is larger than genetic variation within *S. lycopersicum*,  
100 mapping parameters were set as 0.5 for the length fraction and 0.9 for the  
101 similarity fraction. The reads of the same individual in different lanes were  
102 merged together. In the subsequent analyses using Stacks, the *ref\_map.pl*  
103 command set the parameter *-m* (minimum read depth to create a stack) as 10,  
104 and the *populations* command set the parameter *-p* (minimum number of  
105 populations a locus must be present) as 75. SNPs with a minor allele  
106 frequency of less than 0.05 were further excluded, and a set of 24,330 SNP  
107 markers was obtained. ITAG2.4 gene model from SGN was used as the  
108 reference gene annotation.

### 109 **Identification of insertion/deletion (InDel) and simple sequence repeat** 110 **(SSR) markers**

111 InDels were identified from the Sequence Alignment Map (SAM) files of  
112 all *S. pimpinellifolium* accessions with a read depth of no less than two using  
113 the “InDels and Structural Variants” tool and the “Compare variants” tool  
114 provided in the CLC Genomics Workbench software (“CLC Genomics  
115 Workbench 6.5.1”). InDel markers in the form of tandem repeated sequences  
116 were classified as SSR markers.

## 117 **Population differentiation**

118 To avoid redundant SNP markers used in the subsequent analyses, only  
119 one SNP that showed complete LD ( $r^2 = 1$ ) in the same sequencing block  
120 around a *Pst*I site was kept whenever more than one SNP existed in the  
121 sequencing block. This process resulted in a total of 19,993 SNP markers  
122 extracted from the set of 24,330 SNPs noted above. Principle component  
123 analysis (PCA) was performed using TASSEL5.0 (Bradbury *et al.* 2007).  
124 Population differentiation was investigated via ADMIXTURE (Alexander *et al.*  
125 2009). Calculation of pairwise  $F_{st}$  (Weir and Cockerham 1984) and analysis of  
126 molecular variance (AMOVA) (Excoffier *et al.* 1992) were conducted in the R  
127 packages hierfstat (Goudet and Jombart 2015) and StAMPP (Pembleton *et al.*  
128 2013), respectively.

## 129 **Estimate of genetic variation and LD**

130 The genotypes of the 24,330 SNP markers were used to estimate genetic  
131 variation and LD in this *S. pimpinellifolium* population. Genetic variation within  
132 overall accessions and each of seven groups was assessed based on  
133 observed heterozygosity and the within-population gene diversity (expected  
134 heterozygosity) using the R package hierfstat (Goudet and Jombart 2015).  
135 Pairwise  $r^2$  values between SNP markers were calculated to assess overall  
136 extent of LD via plink1.9 within a 1-Mb window (Gaunt *et al.* 2007) and fit by  
137 non-linear regression (Remington *et al.* 2001). The baseline of the  $r^2$  value was  
138 set at 0.1 (Bauchet *et al.* 2017). To assess the local LD along each  
139 chromosome, we defined the basic unit for local LD as the sequencing region  
140 surrounding a *Pst*I site, usually 186 bp long, which has at least one SNP with a



141 minor allele frequency greater than 0.05 in the *S. pimpinellifolium* population.  
142 For each pair of consecutive basic units, the average  $r^2$  was calculated  
143 between two SNPs in different basic units and plotted along the left *Pst*I cutting  
144 site based on the physical position. The heterochromatin regions were marked  
145 according to the genetic map of EXPIM 2012 and the physical map of the  
146 tomato reference genome (Sim *et al.* 2012b).

#### 147 **Analysis of SolCAP array data of *S. pimpinellifolium***

148 The SolCAP data of 214 samples of *S. pimpinellifolium* were downloaded  
149 from previous studies (Blanca *et al.* 2012, 2015; Sim *et al.* 2012a). A set of  
150 4,326 bi-allelic SNPs was first extracted and filtered with the criteria that minor  
151 allele frequency is greater than 0.05 and the proportion of missing genotypes  
152 is less than 25%. These SNP-filtering criteria are the same as the criteria  
153 applied to the SNP dataset generated in this study. This procedure resulted in  
154 2,817 SNPs. Subsequently, population differentiation was investigated by  
155 ADMIXTURE (Alexander *et al.* 2009). Because some accessions appeared in  
156 different SolCAP genotyping studies and their genotypes were not completely  
157 matched, different suffixes—“\_2012S,” “\_2012B,” and “\_2015B,”—were added  
158 to the accession name to indicate their origins from references Sim *et al.*  
159 2012a, Blanca *et al.* 2012, and Blanca *et al.* 2015, respectively. In addition, the  
160 percentage of identical SNP genotypes between accessions with the same  
161 name was calculated based on the 4,326 SNP genotypes and excluding  
162 missing values.

## 163 **Data availability**

164 All the sequences of RADseq are available at the NCBI SRA database,  
165 and the BioProject Number is PRJNA358110. Supplemental files available at  
166 FigShare: <https://doi.org/10.6084/m9.figshare.7010495.v1> for supplemental  
167 figures; <https://doi.org/10.6084/m9.figshare.7010492.v1> for supplemental  
168 tables.

## 169 **RESULTS**

### 170 **Identification of 24,330 SNPs from *Pst*I-digested DNA libraries**

171 A total of 655,973,270 short DNA reads were obtained from four lanes of  
172 the Illumina HiSeq2000 flow cell and were divided into 99 parts according to  
173 barcode sequences. Each part was derived from the DNA of a  
174 *S. pimpinellifolium* accession and contained at least 3.7 million DNA reads,  
175 except for LA2647 (Table S1). To ensure the accuracy of SNP calling and  
176 genotype calling, two criteria were set: one was that the read depth aligning to  
177 the reference sequences was equal to or greater than 10, and the other was  
178 that at least 75% of the accessions showed genotypes associated with a  
179 defined SNP marker.

180 Among the 82,814 *Pst*I sites in the tomato reference sequence SL2.50,  
181 only 23,988 *Pst*I sites were around the sequenced DNA reads (Table S2). The  
182 sequenced regions included 0.54% of the SL2.50 reference sequences and  
183 12,790 annotated genes (Table 1). Interestingly, approximately 84% of the  
184 sequenced *Pst*I sites were located in the euchromatic regions (Table S2).  
185 Nevertheless, no significant difference was observed in the proportion of

186 sequencing regions for SNP discovery between the euchromatic regions  
187 (68.85%) and the heterochromatic regions (60.59%) (Table S2). A total of  
188 67,804 SNPs were identified in the sequenced regions of 99  
189 *S. pimpinellifolium* accessions, and 24,330 of them had a minor allele  
190 frequency greater than 0.05.

191 In the genotypic dataset of 24,330 SNP markers (Table S3), the missing  
192 proportion of each accession ranged from 0.72% to 15.92%, except for  
193 LA2647, for which the value was 65.68% due to a low number of sequencing  
194 reads (Table S1). Regarding the features of these 24,330 SNPs, 16,365 SNPs  
195 were located in 7,383 annotated genes (Table 1) and the remaining SNPs  
196 were located in the intergenic regions. In addition, 3,068 InDels (Table S4) and  
197 107 SSR markers (Table S5) were obtained. In the subsequent analyses, only  
198 SNP markers were utilized, and the genotypic data of the LA0411 accession  
199 was dropped because the observed heterozygosity of LA0411 was  
200 inconsistent with its mating type (Table S1).

201

## 202 **Genetic differentiation of *S. pimpinellifolium* corresponded to the** 203 **geographic area**

204 The collection of 98 *S. pimpinellifolium* accessions in this study was  
205 divided into seven groups corresponding to three ancestral populations using  
206 the ADMIXTURE software (Figure 1A and Figure S1). The seven groups  
207 included three groups with pure ancestry, three groups with an admixture of  
208 two different ancestries, and one group with an admixture of three ancestries.  
209 As expected, accessions in each group were clustered together in the PCA

210 plot, in which principal component 1 (PC1), PC2, PC3, PC4 and PC5  
211 explained 16.04%, 8.00%, 3.94%, 3.12% and 2.54% of the variation,  
212 respectively (Figure 1B). Interestingly, most accessions in the same group  
213 were in the same vicinity in terms of their collection sites (Figure 1C). In  
214 addition, different ancestral groups were spread in somewhat distinct  
215 geographic areas along the coastline from Ecuador to southern Peru (Figure  
216 1C). The geographic distribution of these groups appeared in the following  
217 order from north to south: the pure red ancestral group, the admixture group  
218 with red-blue ancestries, the pure blue ancestral group, the admixture group  
219 with blue-green ancestries, and the pure green ancestral group (Figure 1C).  
220 This geographic distribution showed a trend in which the admixture groups  
221 were located between their corresponding pure ancestral groups.

222 To compare genetic variation within pure ancestral groups or within  
223 admixture groups, the within-population gene diversity of each group was  
224 calculated. The blue group and the red-blue group showed the highest genetic  
225 variation among the pure ancestral groups and the admixture groups,  
226 respectively (Table 2). Both groups were in northern Peru, which indicated that  
227 northern Peru is the origin of *S. pimpinellifolium*. Pairwise  $F_{st}$  confirmed the  
228 population differentiation (Table S6), and AMOVA revealed that the variation  
229 between groups was 41.96% (p-value < 0.001).

230 The differentiation of two mating types, FSC and ASC, was expected  
231 because non-random mating would disrupt the Hardy-Weinberg equilibrium,  
232 leading to population structure (Weir and Cockerham 1984; Holsinger and  
233 Weir 2009). In this collection, most FSC accessions were clustered in northern  
234 Peru, while ASC accessions were scattered in Ecuador and central and

235 southern Peru, along the western side of the Andes Mountains to the coast  
236 (Figure S2). The pairwise  $F_{st}$  (0.0029) of FSC and ASC was significant  
237 (p-value < 0.001). However, PCA presented unclear clusters between FSC  
238 and ASC (Figure S3). In addition, the variation between FSC and ASC was  
239 only 5.91% despite the significance of AMOVA (p-value < 0.001).

#### 240 **Rapid LD decay**

241 Overall LD decay was estimated for the mapping resolution in GWAS. In  
242 this population, the non-linear regression curve dropped very quickly (Figure  
243 S4). Following the non-linear regression curve, the overall LD decay was  
244 within 18 Kb when the baseline of the  $r^2$  value was set at 0.1 (Table 3 and  
245 Figure 2A). The fastest LD decay was within 10 Kb on chromosome 9 while the  
246 slowest decay was within 30 Kb on chromosome 4 (Table 3 and Figure S5).

247

#### 248 **Heterogeneity of genetic recombination within each chromosome**

249 LD decay has often been estimated for each chromosome (Sim *et al.*  
250 2012a; Bauchet *et al.* 2017). However, the LD decay per chromosome was  
251 insufficient to capture the local variations of historically accumulated  
252 recombination events because the tomato genome comprises more than 75%  
253 heterochromatin, which usually suppresses recombination events (Sim *et al.*  
254 2012a). The local LD profile of individual chromosomes was assessed based  
255 on the average  $r^2$  value of flanking sequencing units that contained at least  
256 one SNP marker. Two major trends were observed (Figure 2B and Figure S6).  
257 Marker density in the heterochromatic regions was lower than that in the  
258 euchromatic regions, and approximately two-thirds of the  $r^2$  values were less

259 than 0.1 (Table 3). The latter observation indicated that these flanking SNP  
260 markers were not in a state of linkage disequilibrium.

261

262

## DISCUSSION

263 **A similar distribution between genes and SNPs was identified in the**  
264 **vicinity of *Pst*I cutting site throughout the genome**

265 The observation that 67.26% (16,365 to 24,330) of the SNPs were  
266 located in the annotated gene regions (Table 1) implied a correlation between  
267 the distribution of the identified SNPs in the current study and the distribution  
268 of the annotated genes. Additional observations in the current study indicated  
269 a preference for genomic DNA digestion by the *Pst*I restriction enzyme in the  
270 euchromatic regions: only 28.97% (23,988 to 82,814) of *Pst*I sites were found  
271 in the deep sequencing regions, and 83.55% (20,043 to 23,988) of the deep  
272 sequencing regions were located in the euchromatic region (Table S2). It is  
273 worth noting that the current RADseq protocol did produce low coverage of  
274 sequencing reads in certain *Pst*I sites (with a read depth less than 10), and  
275 these *Pst*I sites were filtered by the criteria of SNP and genotype calling;  
276 therefore, the deep sequencing regions indicated that their read depths were  
277 no less than 10. Incidentally, because SNPs can be identified only in the  
278 sequenced regions, it is a reasonable deduction that most SNPs found in the  
279 current study are located in the euchromatic regions. Plotting the annotated  
280 genes, the expected *Pst*I sites, the *Pst*I sites in the deep sequencing regions,  
281 and the 24,330 SNPs identified in the current study (Figure 3A, 3B, 3C, and 3D,

282 respectively), shows clearly that the annotated tomato genes, the *Pst*I sites in  
283 the deep sequencing regions, and identified SNPs are mainly located in the  
284 euchromatic regions.

285 *Pst*I is a methylation-sensitive restriction enzyme and recognizes the  
286 sequences “CTGCAG” (Dobritsa and Dobritsa 1980). The study of the  
287 genome-wide methylation pattern in tomato leaves and immature fruits  
288 revealed that the gene-rich euchromatic regions at the distal ends of  
289 chromosomes were characterized as the regions with low levels of cytosine  
290 methylation at the “CG”, “CTG”, and “CAG” sequences, and the  
291 pericentromeric heterochromatin regions were the regions with high levels of  
292 cytosine methylation (Zhong *et al.* 2013). Because the young tomato leaves  
293 were used as the DNA source to construct the RADseq libraries, it is  
294 reasonable to infer that the *Pst*I-digested RADseq-targeted chromosomal  
295 regions were concentrated in the gene-rich euchromatic regions. Therefore,  
296 one can emphasize the sequencing resources on euchromatic regions via *Pst*I  
297 RADseq when preparing candidate gene research for tomatoes.

298

## 299 **The discrepancy in inferences of population differentiation of *S.***

### 300 ***pimpinellifolium***

301 The estimation of the best subpopulation number (K) is very important in  
302 GWAS because population structure is integrated as a correction to eliminate  
303 the inflated significance due to confounding effects (Korte and Farlow 2013). If  
304 the best K of a certain population could not be confirmed, the results of GWAS  
305 would be unreliable. However, several previous studies did not achieve the

306 same best K of *S. pimpinellifolium*: 10 SSR markers for 248 individuals  
307 obtained an unclear K (Zuriaga *et al.* 2009); 48 SSR markers for 190  
308 individuals revealed a best K = 2 with admixtures following a K = 5 (Rao *et al.*  
309 2012); finally, the SolCAP array for two collections of 63 and 112 individuals  
310 obtained the same best K = 3 with admixtures (Blanca *et al.* 2012, 2015). Our  
311 study obtained the best K = 3, but our ancestral and admixture groups were  
312 different from the latter studies of the SolCAP array (Blanca *et al.* 2012, 2015).  
313 These previous studies suggested that the *S. pimpinellifolium* population was  
314 differentiated into three ancestral groups: one in the northern Ecuador; another  
315 in the mountainous area from southern Ecuador extending to northern Peru,  
316 and the third in the low-altitude areas of Peru, along with certain admixtures  
317 (Blanca *et al.* 2012, 2015). In contrast, our study showed that the  
318 *S. pimpinellifolium* accessions were clustered into three pure ancestral groups,  
319 with one in Ecuador (the red group), another in northern Peru (the blue group),  
320 and the third in southern Peru (the green group), as well as three clearly  
321 identified admixture groups (Figure 1C).

322 To investigate the potential reasons for the inconsistent conclusions  
323 between the current study and the previous studies based on SNP markers,  
324 genotypic data of the *S. pimpinellifolium* accessions made from the SolCAP  
325 array in three previous studies were obtained from internet (Blanca *et al.* 2012,  
326 2015; Sim *et al.* 2012a) and a meta-analysis was conducted using our  
327 workflow (please see details in the “Materials and Methods” section) (Table  
328 S7). A total of 214 samples representing 126 accessions were divided into 11  
329 groups via ADMIXTURE using filtered genotypes of 2,817 SNP markers.  
330 However, the results of this meta-analysis pose two problems. First, the



331 cross-validation error did not confirm that  $K = 11$  was the optimal grouping  
332 method (Figure S7 and Figure S8). This condition can be explained as a low  
333 population structure in a population with high genetic diversity, which may  
334 have resulted from frequent gene flow (Gevaert *et al.* 2013).

335 Overrepresentation of common SNPs within *S. pimpinellifolium* accessions on  
336 the SolCAP genotyping array could be the other reason given that the SolCAP  
337 array was originally created to explore the genetic variation within cultivated  
338 tomatoes and to map genes (Hamilton *et al.* 2012; Sim *et al.* 2012a, 2012b).

339 The second problem was that certain samples belonging to the same  
340 accession were not clustered in the same group. For example, two samples of  
341 the BGV007104 accession, which shared 93.23% genotypic identity in this  
342 SNP set (Table S8) and were labeled as BGV007104\_2012B and  
343 BGV007104\_2015B, were assigned to different groups (Figure S8). The wrong  
344 grouping for the samples of the same accession may result from an insufficient  
345 number of SNP markers that were unable to capture similarity within the same  
346 accession when the sample size increases. In an empirical study of  
347 *Arabidopsis halleri*, a few thousand SNP markers were required to estimate  
348 the genetic diversity among populations with different genetic variation  
349 (Fischer *et al.* 2017). The latter problem prevented meaningful comparisons  
350 between the inference of population differentiation in the current study and that  
351 of the meta-analysis. Regardless of the inconsistent best  $K$  among these  
352 studies, the results of pairwise  $F_{st}$  and AMOVA statistically supported the  
353 subpopulations in this study, suggesting that this set of high-density SNPs  
354 could stably estimate the best  $K$ .

355

356 **A group of individuals would be a better representative of an accession**

357 An accession should be represented by a group of samples rather than  
358 only a single individual since an accession in its natural habitat is composed of  
359 a group of individuals, especially when gathering accessions with high  
360 diversity. However, under circumstances with limited resources, we instead  
361 prepared a collection representing a population rather than only several  
362 accessions because our final goal was to apply *S. pimpinellifolium* in GWAS.  
363 In addition, the mating system and the propagation method of *S.*  
364 *pimpinellifolium* made the variations between accessions greater than that  
365 within accessions. Therefore, our only option was to involve as much diversity  
366 as possible to enhance the efficiency of GWAS.

367

368 **High genetic variation leads to rapid LD decay**

369 The observed and expected heterozygosity of this population were  
370 0.0761 and 0.2786, respectively, slightly higher than in previous research  
371 (Blanca *et al.* 2012, 2015). Since *S. pimpinellifolium* was detected with up to a  
372 40% outcrossing rate (Rick *et al.* 1977) and demonstrated high genetic  
373 variation, it is expected to cause rapid LD decay. In this study, LD decay was  
374 within 18 Kb throughout the genome, which was much shorter than in  
375 cultivated tomatoes (Sim *et al.* 2012a; Bauchet *et al.* 2017). However, such  
376 high genetic variation requires much more markers to enable the  
377 comprehensive detection in GWAS. The 900-Mb tomato genome requires at  
378 least 50,000 markers to cover the entire genome evenly. Therefore, acquiring  
379 more SNPs using different methods is essential to conduct a GWAS in the

380 *S. pimpinellifolium* population. One possible approach is to increase the  
381 sample size evenly for each subpopulation (Brachi *et al.* 2011). Since  
382 approximately 64% of alleles were rare in this population, the augmentation of  
383 the subpopulation size may adjust rare alleles to common alleles, potentially  
384 increasing the SNPs without extending coverage. Another possible strategy is  
385 exome sequencing, a selective genome sequencing technology that selects  
386 desired sequencing regions by the hybridization of designed probes (Kaur and  
387 Gaikwad 2017). Based on tomato genome sequence information, such as the  
388 gene model or EST database, one could design different sets of probes to limit  
389 sequencing regions (Ruggieri *et al.* 2017). Given the approximately 110 Mb  
390 total gene length in the ITAG2.4 gene model, the potential coverage could  
391 reach 12% and all target the gene region. This exome sequencing strategy  
392 may be able to increase SNPs without increasing the population size.

393

394 **A reproductive strategy would reduce the genetic diversity of *S.***

395 ***pimpinellifolium***

396 These accessions were propagated using single-seed descent for two  
397 generations. Therefore, the heterozygosity would be reduced compared to the  
398 original specimens, especially for FSC accessions. Here, we revealed that an  
399 ASC accession, LA0411, presented 40.25% heterozygosity, which highlighted  
400 the contradiction of self-fertilization consequence. Lacking the same accession  
401 as a reference in previous studies and considering the 0 to 22% heterozygosity  
402 of other accessions in the original published research (Rick *et al.* 1977), we  
403 could remove only LA0411 from our analyses based on the fact that its

404 heterozygosity was too high for an ASC accession.

## 405 **ACKNOWLEDGMENTS**

406 We thank the C.M. Rick Tomato Genetics Resource Center for generously  
407 providing plant materials to conduct this experiment and Dr. Tze-Tze Liu in the  
408 Genome Research Center at the National Yang-Ming University, Taiwan, for  
409 providing help and advice of the massive parallel DNA sequencing task. This  
410 work was supported by grants from the Ministry of Science and Technology,  
411 Taiwan R.O.C. (Project Nos. NSC 96-2313-B-002-034-MY3 and NSC  
412 101-2313-B-002-006-MY3) to KYC and from National Taiwan University  
413 (Project Nos. 103R7858 and 104R7858) to KYC. This work represents the  
414 partial fulfillment of requirements for YPL's Ph.D. degree.

## 415 **LITERATURE CITED**

- 416 Alexander, D. H., J. Novembre, and K. Lange, 2009 Fast Model-Based  
417 Estimation of Ancestry in Unrelated Individuals. *Genome Res.* 1655–1664.
- 418 Bauchet, G., S. Grenier, N. Samson, J. Bonnet, L. Grivet *et al.*, 2017 Use of  
419 modern tomato breeding germplasm for deciphering the genetic control of  
420 agronomical traits by Genome Wide Association study. *Theor. Appl. Genet.*  
421 130: 875–889.
- 422 Bhakta, M. S., V. A. Jones, and C. E. Vallejos, 2015 Punctuated distribution of  
423 recombination hotspots and demarcation of pericentromeric regions in  
424 *Phaseolus vulgaris* L. *PLoS One* 10(1): e0116822.
- 425 Blanca, J., J. Cañizares, L. Cordero, L. Pascual, M. J. Diez *et al.*, 2012

- 426 Variation Revealed by SNP Genotyping and Morphology Provides Insight  
427 into the Origin of the Tomato. PLoS One 7(10): e48198.
- 428 Blanca, J., J. Montero-Pau, C. Sauvage, G. Bauchet, E. Illa *et al.*, 2015  
429 Genomic variation in tomato, from wild ancestors to contemporary  
430 breeding accessions. BMC Genomics 16: 257.
- 431 Brachi, B., G. P. Morris, and J. O. Borevitz, 2011 Genome-wide association  
432 studies in plants: the missing heritability is in the field. Genome Biol. 12:  
433 232.
- 434 Bradbury, P. J., Z. Zhang, D. E. Kroon, T. M. Casstevens, Y. Ramdoss *et al.*,  
435 2007 TASSEL: Software for association mapping of complex traits in  
436 diverse samples. Bioinformatics 23: 2633–2635.
- 437 Caicedo, A. L., and B. A. Schaal, 2004 Population structure and  
438 phylogeography of *Solanum pimpinellifolium* inferred from a nuclear gene.  
439 Mol. Ecol. 13: 1871–1882.
- 440 Capel, C., A. Fernández, J. Manuel, V. Lima, S. Francesc *et al.*, 2015  
441 Wide-genome QTL mapping of fruit quality traits in a tomato RIL population  
442 derived from the wild-relative species *Solanum pimpinellifolium* L. Theor.  
443 Appl. Genet. 128: 2019–2035.
- 444 Catchen, J., P. A. Hohenlohe, S. Bassham, A. Amores, and W. A. Cresko, 2013  
445 Stacks: An analysis tool set for population genomics. Mol. Ecol. 22: 3124–  
446 3140.
- 447 Chen, A. L., C. Y. Liu, C. H. Chen, J. F. Wang, Y. C. Liao *et al.*, 2014  
448 Reassessment of QTLs for late blight resistance in the tomato accession  
449 L3708 using a restriction site associated DNA (RAD) linkage map and  
450 highly aggressive isolates of *Phytophthora infestans*. PLoS One 9(5):

- 451 e96417.
- 452 CLC Genomics Workbench 6.5.1.
- 453 Davey, J. L., and M. W. Blaxter, 2010 RADseq: Next-generation population  
454 genetics. *Brief. Funct. Genomics* 9: 416–423.
- 455 Dobritsa, A. P., and S. V. Dobritsa, 1980 DNA protection with the DNA  
456 methylase M · *BbvI* from *Bacillus brevis* var. GB against cleavage by the  
457 restriction endonucleases *PstI* and *PvuII*. *Gene* 10: 105–112.
- 458 Etter, P. D., S. Bassham, P. A. Hohenlohe, E. A. Johnson, and W. A. Cresko,  
459 2011 SNP Discovery and Genotyping for Evolutionary Genetics Using  
460 RAD Sequencing. *Mol. Methods Evol. Genet.* 772: 1–19.
- 461 Excoffier, L., P. E. Smouse, and J. M. Quattro, 1992 Analysis of molecular  
462 variance inferred from metric distances among DNA haplotypes:  
463 Application to human mitochondrial DNA restriction data. *Genetics* 131:  
464 479–491.
- 465 Fernandez-Pozo, N., N. Menda, J. D. Edwards, S. Saha, I. Y. Teclé *et al.*, 2015  
466 The Sol Genomics Network (SGN)-from genotype to phenotype to  
467 breeding. *Nucleic Acids Res.* 43: D1036–D1041.
- 468 Fischer, M. C., C. Rellstab, M. Leuzinger, M. Roumet, F. Gugerli *et al.*, 2017  
469 Estimating genomic diversity and population differentiation- an empirical  
470 comparison of microsatellite and SNP variation in *Arabidopsis halleri*. *BMC*  
471 *Genomics* 18: 1–15.
- 472 Fulton, T. M., J. Chunwongse, and S. D. Tanksley, 1995 Microprep protocol for  
473 extraction of DNA from tomato and other herbaceous plants. *Plant Mol.*  
474 *Biol. Report.* 13: 207–209.
- 475 Gaunt, T. R., S. Rodríguez, and I. N. Day, 2007 Cubic exact solutions for the

- 476 estimation of pairwise haplotype frequencies: implications for linkage  
477 disequilibrium analyses and a web tool “CubeX”. BMC Bioinformatics 8:  
478 428.
- 479 Gevaert, S. D., J. R. Mandel, J. M. Burke, and L. A. Donovan, 2013 High  
480 genetic diversity and low population structure in Porter’s sunflower  
481 (*Helianthus porteri*). J. Hered. 104: 407–415.
- 482 Goudet, J., and T. Jombart, 2015 hierfstat: Estimation and Tests of Hierarchical  
483 F-Statistics.
- 484 Grandillo, S., R. Chetelat, S. Knapp, D. Spooner, I. Peralta *et al.*, 2011 *Wild*  
485 *Crop Relatives: Genomic and Breeding Resources Vegetables* (C. Kole,  
486 Ed.). Springer Heidelberg Dordrecht London New York.
- 487 Hamilton, J. P., S. Sim, K. Stoffel, A. Van Deynze, C. R. Buell *et al.*, 2012 Single  
488 Nucleotide Polymorphism Discovery in Cultivated Tomato via Sequencing  
489 by Synthesis. Plant Genome 5: 17–29.
- 490 Holsinger, K. E., and B. S. Weir, 2009 Genetics in geographically structured  
491 populations: defining, estimating and interpreting  $F_{ST}$ . Nat. Rev. Genet. 10:  
492 639–650.
- 493 Kaur, P., and K. Gaikwad, 2017 From Genomes to GENE-omes: Exome  
494 Sequencing Concept and Applications in Crop Improvement. Front. Plant  
495 Sci. 8: 1–7.
- 496 Korte, A., and A. Farlow, 2013 The advantages and limitations of trait analysis  
497 with GWAS: a review. Plant Methods 9: 29.
- 498 Moyle, L. C., 2008 Ecological and evolutionary genomics in the wild tomatoes  
499 (*Solanum* Sect. *Lycopersicon*). Evolution. 62: 2995–3013.
- 500 Pascual, L., N. Desplat, B. E. Huang, A. Desgroux, L. Bruguier *et al.*, 2015

- 501 Potential of a tomato MAGIC population to decipher the genetic control of  
502 quantitative traits and detect causal variants in the resequencing era. *Plant*  
503 *Biotechnol. J.* 13: 565–577.
- 504 Pembleton, L. W., N. O. I. Cogan, and J. W. Forster, 2013 StAMPP: An R  
505 package for calculation of genetic differentiation and structure of  
506 mixed-ploidy level populations. *Mol. Ecol. Resour.* 13: 946–952.
- 507 Ranc, N., S. Munos, J. Xu, M. C. Le Paslier, A. Chauveau *et al.*, 2012  
508 Genome-wide association mapping in tomato (*Solanum lycopersicum*) is  
509 possible using genome admixture of *Solanum lycopersicum* var.  
510 *cerasiforme*. *G3* 2: 853–864.
- 511 Rao, E. S., P. Kadirvel, R. C. Symonds, S. Geethanjali, and A. W. Ebert, 2012  
512 Using SSR markers to map genetic diversity and population structure of  
513 *Solanum pimpinellifolium* for development of a core collection. *Plant Genet.*  
514 *Resour.* 10: 38–48.
- 515 Rao, E. S., P. Kadirvel, R. C. Symonds, S. Geethanjali, R. N. Thontadarya *et al.*,  
516 2015 Variations in *DREB1A* and *VP1.1* genes show association with salt  
517 tolerance traits in wild tomato (*Solanum pimpinellifolium*). *PLoS One* 10:  
518 1–19.
- 519 Remington, D. L., J. M. Thornsberry, Y. Matsuoka, L. M. Wilson, S. R. Whitt *et*  
520 *al.*, 2001 Structure of linkage disequilibrium and phenotypic associations in  
521 the maize genome. *Proc. Natl. Acad. Sci. U. S. A.* 98: 11479–11484.
- 522 Rick, C., J. Fobes, and M. Holle, 1977 Genetic variation in *Lycopersicon*  
523 *pimpinellifolium*: Evidence of evolutionary change in mating systems. *Plant*  
524 *Syst. Evol.* 127: 139–170.
- 525 Ruggieri, V., I. Anzar, A. Paytuyi, R. Calafiore, R. A. Cigliano *et al.*, 2017



- 526 Exploiting the great potential of Sequence Capture data by a new tool,  
527 SUPER-CAP. *DNA Res.* 24: 81–91.
- 528 Sim, S. C., A. van Deynze, K. Stoffel, D. S. Douches, D. Zarka *et al.*, 2012a  
529 High-density SNP genotyping of tomato (*Solanum lycopersicum* L.)  
530 reveals patterns of genetic variation due to breeding. *PLoS One* 7(9):  
531 e45520.
- 532 Sim, S. C., G. Durstewitz, J. Plieske, R. Wieseke, M. W. Ganal *et al.*, 2012b  
533 Development of a large SNP genotyping array and generation of  
534 high-density genetic maps in tomato. *PLoS One* 7: e40563.
- 535 Soto-Cerda, B. J., and S. Cloutier, 2012 Association mapping in plant genomes,  
536 in *Genetic Diversity in Plants*, edited by C. Mahmut. InTech, Rijeka.
- 537 Spooner, D. M., I. E. Peralta, and S. Knapp, 2005 Comparison of AFLPs with  
538 other markers for phylogenetic inference in wild tomatoes [*Solanum* L.  
539 section *Lycopersicon* (Mill.) Wettst.]. *Taxon* 54: 43–61.
- 540 Tanksley, S. D., and S. R. Mccouch, 1997 Seed Banks and Molecular Maps :  
541 Unlocking Genetic Potential from the Wild. *Science.* 277: 1063–1066.
- 542 Viquez-zamora, M., M. Caro, R. Finkers, Y. Tikunov, A. Bovy *et al.*, 2014  
543 Mapping in the era of sequencing : high density genotyping and its  
544 application for mapping TYLCV resistance in *Solanum pimpinellifolium*.  
545 *BMC Genomics* 15: 1–10.
- 546 Weir, B. S., and C. C. Cockerham, 1984 Estimating F-Statistics for the Analysis  
547 of Population Structure. *Evolution.* 38: 1358–1370.
- 548 Zhong, S., Z. Fei, Y. R. Chen, Y. Zheng, M. Huang *et al.*, 2013 Single-base  
549 resolution methylomes of tomato fruit development reveal epigenome  
550 modifications associated with ripening. *Nat. Biotechnol.* 31: 154–159.

551 Zuriaga, E., J. M. Blanca, L. Cordero, A. Sifres, W. G. Blas-Cerdán *et al.*, 2009  
552 Genetic and bioclimatic variation in *Solanum pimpinellifolium*. *Genet.*  
553 *Resour. Crop Evol.* 56: 39–51.

554

## 555 **Figure legend**

556 **Figure 1.** Ancestry and geographic distribution of 98 *Solanum pimpinellifolium*  
557 accessions from the Tomato Genetics Resource Center. A) Model-based  
558 ancestry for each accession. B) Principle component analysis of the  
559 *S. pimpinellifolium* population. C) Geographical distribution of the 98  
560 *S. pimpinellifolium* accessions. Symbol and color codes are as follows: square  
561 symbols with red, blue and green colors were used to indicate three pure  
562 ancestry groups corresponding to the same colors in the ancestry plot; triangle  
563 symbols with goldenrod, purple and aquamarine colors were used to present  
564 the three admixture groups with red-green, red-blue and blue-green mixing  
565 ancestries, respectively; black circle symbols were used for the group with  
566 admixture of three ancestries.

567

568 **Figure 2.** Visualization for LD. A) The 50 Kb interval of overall LD decay. The  
569 red curve indicates non-linear regression, and the black dotted line indicates  
570 the baseline of  $r^2$  at 0.1. B) The local LD of chromosome 1. The red dotted line  
571 indicates the baseline of  $r^2$ , and the orange line indicated the heterochromatic  
572 region.

573

574 **Figure 3.** The distributions of ITAG2.4 gene model, *Pst*I cutting sites and  
575 SNPs throughout the genome. Each section indicates one chromosome, with

576 labeling on the circumference. Circles A, B, C, and D indicate the distribution of  
577 ITAG2.4 genes, expected *Pst*I cutting sites, *Pst*I cutting sites in the deep  
578 sequencing regions and RADseq SNPs, respectively. The black lines in the  
579 inner D layer indicate the heterochromatic regions.  
580

**A** **K=3**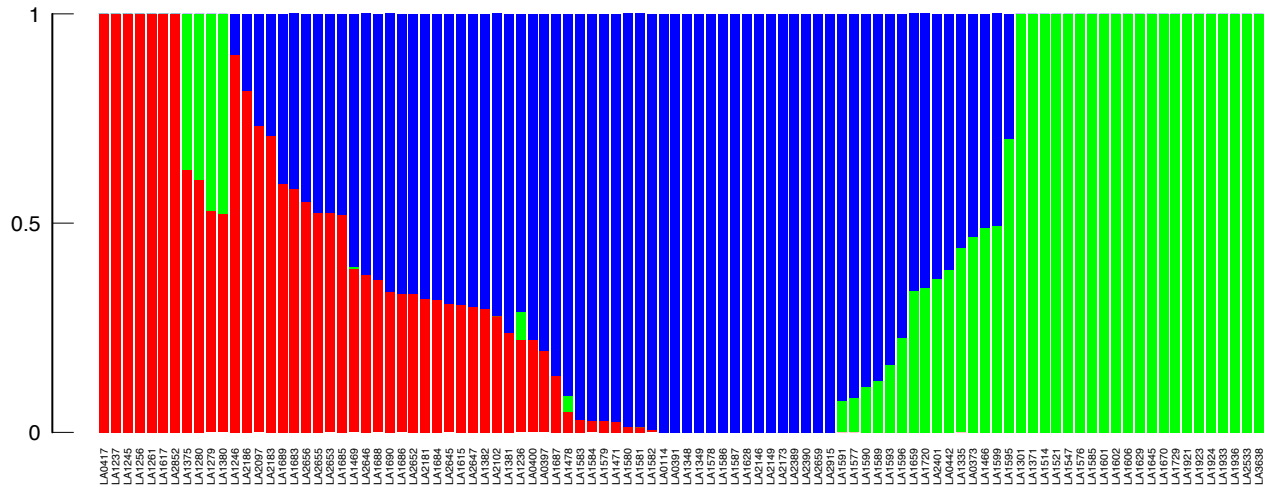**B****PCA**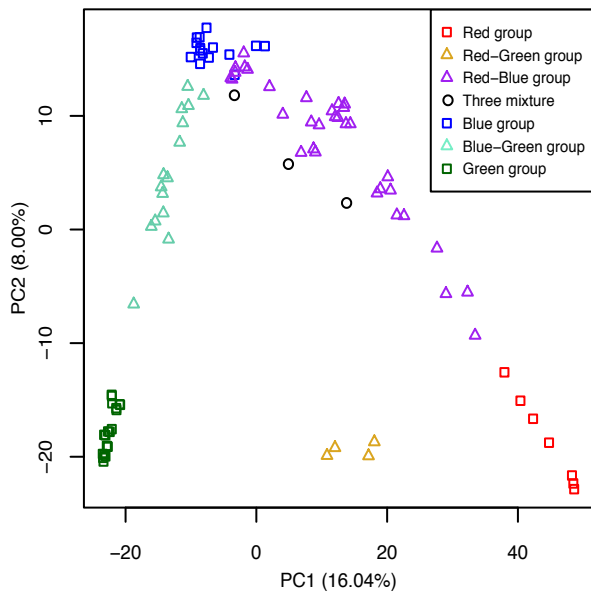**C**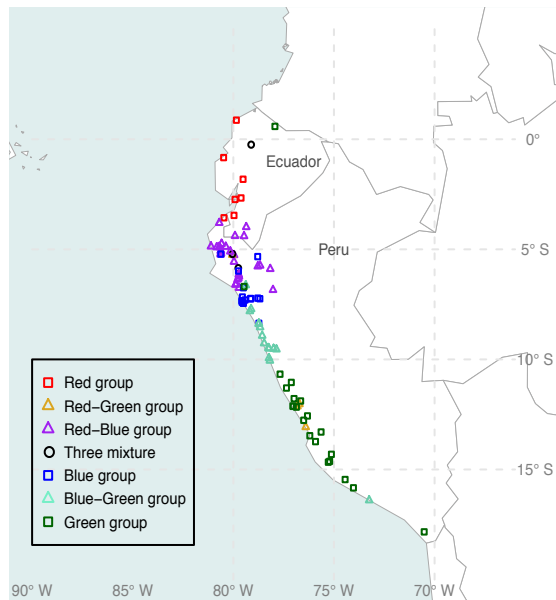

### Zoom-in Overall LD Decay

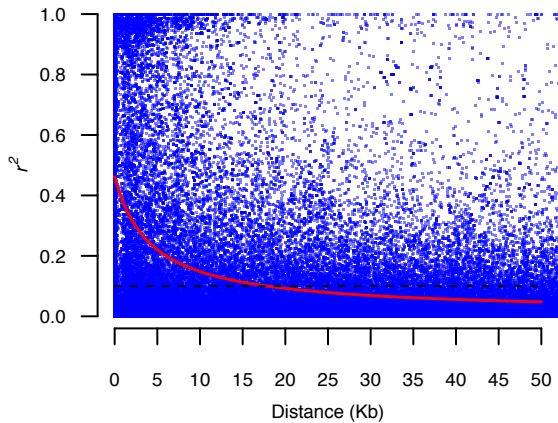

### Chr. 1

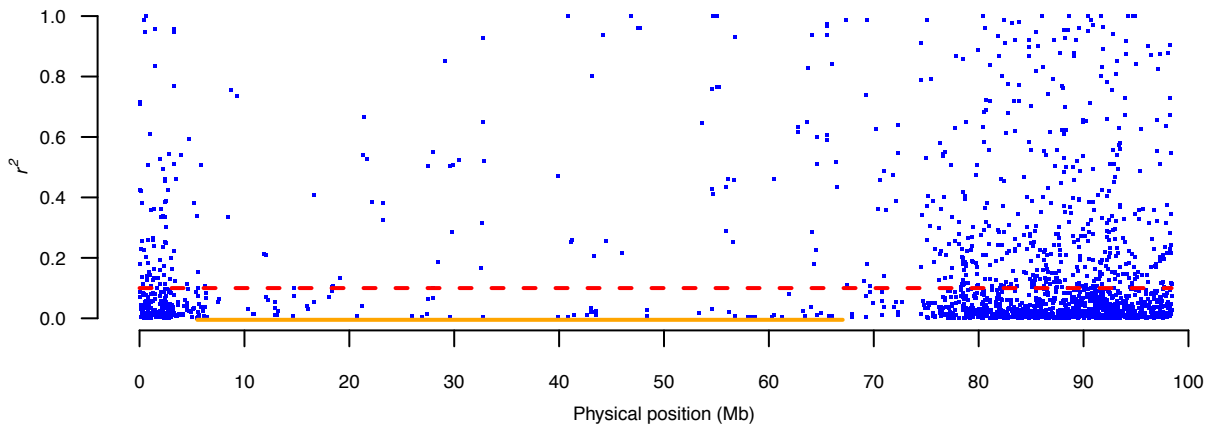

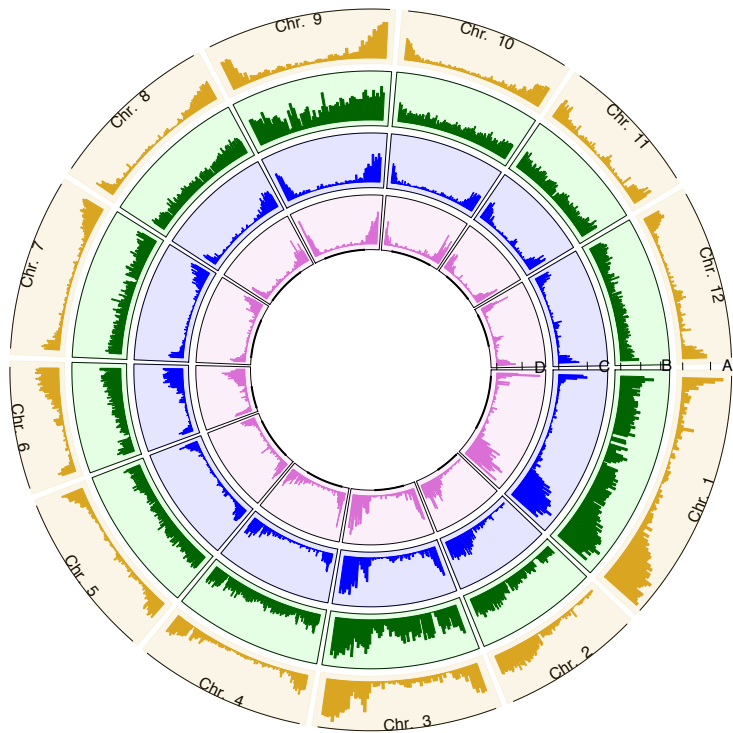

Source: https://www.biorxiv.org/content/10.1101/402420v1.full.pdf
